1 **Microbial communities network structure across strong environmental gradients: How do**  
2 **they compare to macroorganisms?**

3 **Arboleda-Baena<sup>a,b</sup>, C.M; Freilich<sup>c,d</sup>, M. A; Pareja, C.B<sup>b</sup>; Logares, R<sup>e</sup>; De la Iglesia, R<sup>b,f</sup>;**  
4 **Navarrete, S.A<sup>a,f</sup>**

5 <sup>a</sup> Estación Costera de Investigaciones Marinas, Center for Applied Ecology and Sustainability  
6 (CAPES), Millenium Nucleus NUTME, Pontificia Universidad Católica de Chile, Chile

7 <sup>b</sup> Laboratorio de Microbiología Marina, Departamento de Genética Molecular y Microbiología,  
8 Facultad de Ciencias Biológicas, Pontificia Universidad Católica de Chile, Santiago, Chile

9 <sup>c</sup> Department of Earth, Atmospheric and Planetary Science, Massachusetts Institute of  
10 Technology, Cambridge, Massachusetts 02139 USA

11 <sup>d</sup> Department of Physical Oceanography, Woods Hole Oceanographic Institution, Woods Hole,  
12 Massachusetts 02543 USA

13 <sup>e</sup> Instituto de Ciencias del Mar – CSIC, Paseo Marítimo de la Barceloneta, 37 – 49, 080003  
14 Barcelona, Spain

15 <sup>f</sup> Marine Energy Research & Innovation Center (MERIC), Avda. Apoquindo 2827, Santiago,  
16 Chile.

17 Corresponding author e-mail: [claraarboledab@gmail.com](mailto:claraarboledab@gmail.com)

18 1. Some data are already published, with those publications properly cited in this submission:  
19 Broitman et al. 2001 and Freilich et al. 2018.

20 2. Sequence data will be deposited at the European Nucleotide Archive (ENA) public database  
21 under accession number PRJEB45042 and released after the journal acceptance.

22 3. We don't have novel code. But we will provide a copy in Github of the script used  
23 (<https://github.com/ClarArboledaBaena>) after the journal acceptance with the Zenodo DOI.

24 **Abstract**

25 The way strong environmental gradients shape multispecific assemblages has allowed us to  
26 examine a suite of ecological and evolutionary hypotheses about structure, regulation, and  
27 community responses to fluctuating environments. But whether the highly diverse co-occurring,  
28 free-living microorganisms are shaped in similar ways as macroscopic organisms, across the  
29 same gradients, has yet to be addressed in most ecosystems. The ‘everything is everywhere’  
30 hypothesis suggests they are not, at least not to the same extent. Here we characterize the  
31 structure of intertidal microbial biofilm communities and compare the intensity of zonation at the  
32 ‘species’ level, changes in taxonomic diversity and composition at the community level, and  
33 network attributes, with those observed in co-occurring macroalgae and invertebrates. At the  
34 level of species and OTUs, for dominant macro and microorganisms respectively, microbes  
35 showed less variability across the tidal gradient than macroorganisms. At the community-level,  
36 however, microbes and macro-organisms showed similarly strong patterns of tidal zonation, with  
37 major changes in composition and relative abundances across tides. Moreover, the proportion of  
38 ‘environmental specialists’ in different tidal zones was remarkably similar in micro and  
39 macroscopic communities, and taxonomic richness and diversity followed similar trends, with  
40 lower values in the high intertidal zone. Network analyses showed similar connectivity and  
41 transitivity, despite the large differences in absolute richness between the groups. A high  
42 proportion of positive co-occurrences within all tidal zones and mostly negative links between  
43 the high and low tidal zones were observed among habitat specialist taxa of micro- and macro-  
44 organisms. Thus, our results provide partial support to the idea that microbes are less affected by  
45 environmental variability than macroscopic counterparts. At the species-level, the most common  
46 microbe species exhibit less variation across tides than most common macroscopic organisms,

47 suggesting the former perceive a more homogeneous environment and/or are more resistant to  
48 the associated stress. At the community-level, most indicators of community and network  
49 structure across the gradient are similar between microbes and macro-organisms, suggesting that  
50 despite orders of magnitude differences in richness and size, these two systems respond to stress  
51 gradients, giving rise to zonation patterns.

52 **Key words:** Zonation, microorganisms, co-occurrence networks, stress gradients, individual-  
53 and community-responses, network attributes.

54

## 55 **Introduction**

56 Understanding the mechanisms and processes responsible for patterns of abundance and  
57 distribution of species across environmental gradients is one of the main goals of community  
58 ecology (Mittelbach and McGill 2019), and one of the most striking patterns is the zonation of  
59 dominant organisms that occupy different parts of the environmental gradient. These patterns  
60 have served as the basis to test core hypotheses about the organization of communities (e.g.  
61 Whittaker 1959) and the ecological processes shaping fundamental and realized species' niches,  
62 such as physiological tolerances and species interactions (Connell 1961a, 1961b, Menge and  
63 Sutherland 1987). However, this deep understanding of communities of macroscopic organisms  
64 contrasts sharply with the still scarce knowledge about communities of free-living  
65 microorganisms (Fontaneto 2011, Hanson et al. 2012). The 'everything is everywhere, but the  
66 environment selects' hypothesis, set forth by Gerhard Baas Becking in the early 1930s, has  
67 inspired much of the microbial biogeographical and ecological research of the past decades (de  
68 Wit and Bouvier 2006, O'Malley 2007) and suggests that microbial communities are primarily  
69 determined by moderate rates of dispersal and secondarily by environmental variation

70 (selection). It is clear that microbial biodiversity is shaped by environmental gradients, especially  
71 by those factors that alter soil or water pH (Rousk et al. 2010, Krause et al. 2012), temperature  
72 (Logares et al. 2020), and resource availability (Follows et al. 2007). The local environment  
73 ‘selects’ which microorganisms are present and, like in macroscopic organisms, patterns of  
74 abundance and composition across environmental gradients result from the constraints set by  
75 abiotic conditions and the interactions among co-occurring microbes (Fontaneto 2011, Hanson et  
76 al. 2012, Mandakovic et al. 2018). Yet, the question remains, are communities of microbial  
77 organisms less structured across the same environmental gradients than their co-occurring  
78 macroscopic counterparts? If both vary across sharp environmental gradients, are the patterns of  
79 community structure towards the stressful and benign ends of a gradient similar to those  
80 observed in macroscopic organisms? Addressing these and other similar questions allows us to  
81 challenge our ecological models and get valuable insight into how different is the organization  
82 between the micro and macroscopic worlds.

83 Probably the most studied zonation pattern is the one occurring between the highest and lowest  
84 tides along most marine rocky shores of the world (Barnes and Hughes 1999, Raffaelli and  
85 Hawkins 2012). In this habitat, environmental conditions range from entirely aquatic to  
86 completely terrestrial in a few meters (Thompson et al. 2002, Harley and Helmuth 2003); and,  
87 within their absolute tolerance limits, species become consistently more abundant at some tidal  
88 levels than others (Stephenson and Stephenson 1949, Connell 1961a, 1961b). Also, co-  
89 occurrence network analyses show modules (cluster of species highly connected) related to a  
90 specific zonation band due mainly driven by shared environmental preferences (Freilich et al.  
91 2018). Beyond the tidal regime that sets the stage for the stress gradient (Denny and Paine 1998,  
92 Raffaelli and Hawkins 2012), intertidal zonation of macroscopic organisms results from multiple

93 interactive physical factors, including wave exposure and the associated mechanical stresses,  
94 desiccation (Evans 1947), temperature (Wetthey 1983), and solar radiation (Santelices 1990), to  
95 name a few. Additionally, species interactions, including interspecific competition for space  
96 (Connell 1961b), food acquisition (Underwood 1972), facilitation (Bertness and Leonard 1997),  
97 and predation (Connell 1961a, Paine 1966), profoundly modify intertidal zonation. As a result,  
98 zonation of organisms results from a combination of environmental stressors affecting  
99 differentially some species, and the propagation of these effects throughout the community via  
100 species interactions. To what extent the intertidal gradient imposes similar patterns of  
101 community structure on macro and microscopic communities has not been addressed.  
102 Intertidal microbial communities on rocky shores can be found as individual cells or forming  
103 well-defined biofilms that can grow on virtually all surfaces (Callow and Callow 2011). Biofilms  
104 are composed of taxa belonging to the three domains of life, associated with extracellular  
105 polymeric substances (EPS), acquiring important emergent properties such as hydrophobicity,  
106 viscoelasticity, drug resistance among others (Davey and O'toole 2000, Schuster et al. 2019).  
107 Studies have shown that variability in abundance and the broad composition of intertidal epilithic  
108 biofilms are influenced by temperature, desiccation, UV radiation, waves (Thompson et al. 2004,  
109 2005), and the concentration of ions and nutrients (Decho 2000, Dang and Lovell 2016).  
110 Competition and predation between microorganisms (Dang and Lovell 2016), competition with  
111 macroscopic sessile species (Callow and Callow 2011), and top-down control by grazing  
112 macroinvertebrates (Lubchenco 1978, Underwood 1984) all influence abundance and tidal  
113 distribution of major groups of microbial biofilms. However, most ecological studies have  
114 treated biofilms as homogeneous taxonomic units composed of few entities, precluding a  
115 community- or ecological-network approach comparable to macroscopic organisms. Since 2006,

116 massive sequencing techniques allow us to explore and document the diversity of the microbial  
117 world as never before (Hug et al. 2016), opening the doors to address ecological questions.  
118 Here we compare patterns of zonation in taxonomic diversity, richness, and network structure of  
119 the microbial intertidal communities on wave-exposed rocky shores of central Chile and the  
120 well-documented patterns of co-occurring macroscopic organisms (Castilla 1981, Santelices  
121 1990, Kéfi et al. 2015, Freilich et al. 2018). Using the previously defined zonation bands for  
122 macroorganisms, we test four hypotheses: 1) that across the same environmental gradient,  
123 microbial communities show proportionally less differentiation across tidal levels than their  
124 macroscopic counterpart, 2) that taxonomic richness and diversity do not follow similar trends  
125 across the gradient, 3) that the proportion of environmental specialist is higher in the  
126 macroscopic community than in microscopic organisms, 4) that co-occurrence networks of  
127 macroorganisms have modules corresponding roughly with zonation bands, while microbial  
128 networks do not form zonation-related compartments.

129

## 130 **Methods**

131 The comparison of macro and micro-communities represents a large methodological, logistical,  
132 and economic (DNA sequencing) challenge. We propose and describe here a reproducible  
133 method to quantify microbial communities across tidal levels for comparison with macroscopic  
134 communities.

### 135 *Macroscopic community data*

136 Quantitative comparisons with macroscopic communities were based on intertidal surveys  
137 conducted since 1998 across sites in central Chile from the 33° 42' S, 71° 70' W to 33° 59' S, 71°  
138 62' W, including the study site for microscopic studies. Field methods have been described in

139 detail (Broitman et al. 2001, Freilich et al. 2018). Briefly, surveys at each site quantified the  
140 density of mobile species and the cover of sessile species of all macroscopic organisms (>1mm)  
141 in 8-10 50 x 50 cm quadrats along transects parallel to shore at three tidal levels, low, mid, and  
142 high shore. Details of surveys included in this study are presented in **Appendix S1: Table S1**.

### 143 *Microbial community data*

144 Microbial community studies were conducted in the wave-exposed rocky shore at Las Cruces,  
145 central Chile, 33° 50' S, 71° 63' W. The rock is formed by postmetamorphic granite with basaltic  
146 intrusions and high quartz content and tidal range is about 1.8 m, with semidiurnal regime. Since  
147 our goal was to compare the organization of microbial communities across different tidal levels,  
148 it was critical to set a similar successional time and reduce interference with surrounding  
149 macroscopic biota as much as possible. We therefore developed a simple method that can be  
150 replicated in future studies. First, we collected rocks from the same study site and cut them into  
151 coupons of 3 x 8 x 2 cm with a COCH Bridge saw machine that prevented overheating and  
152 potential mineral transformations. Rock coupons were washed with deionized water, dried,  
153 maintained at room temperature, and then attached individually, with a stainless-steel wire,  
154 inside stainless-steel cages 12 x 12 x 4 cm and 5 mm mesh. Cages prevented grazers and other  
155 macroscopic organisms from crawling on the rock coupons. Twelve rock coupons inside a  
156 separate stainless cage were affixed with a stainless-steel screw at each of three tidal zones  
157 haphazardly distributed along tens of meters parallel to the shore. Tidal zones followed the same  
158 levels used in macroscopic studies described above (Santelices 1990, Flores et al. 2019). Five  
159 rocks selected at random were not deployed in the field and were used as rock surface control.  
160 After 40 days of exposure, rock coupons were retrieved and, together with rock surface controls,  
161 were sonicated in sterile marine water, and the biofilm was recovered through 0.22 µm pore

162 filters of hydrophilic polyethersulfone (Merck). Samples were preserved in liquid nitrogen at -  
163 196°C for molecular analyses. A total of five cages with rock coupons were lost due to storms. A  
164 40-day elapsed time has been shown to allow intertidal biofilm communities to reach a  
165 comparatively stable structure at the end of succession, and macroorganisms do not cover them  
166 yet (authors, personal observation).

### 167 *DNA extraction, 16S rRNA sequencing and molecular data analyses*

168 DNA extraction from filters was conducted with the Phenol-Chloroform method (Fuhrman et al.  
169 1988) and DNA samples were clean by the membrane dialysis method with a Millipore 0.025  
170 uM filter (Devaney and Marino 2001). DNA concentration was measured with the Qubit HS  
171 dsDNA Assay kit in a Qubit 2.0 Fluorometer (Life Technologies, Carlsbad, CA, USA) and the  
172 DNA purity was quantified using a NanoDrop-1000 (NanoDrop Technologies, Wilmington,  
173 USA), according to manufacture protocols. The V4-V5 region of the 16S was amplified with the  
174 primers 515FB: GTGYCAGCMGCCGCGGTAA and 926R: CCGYCAATTYMTTTRAGTTT  
175 (Parada et al. 2016). Amplicons were sequenced in a MiSeq Illumina platform (2x300 bp). Both  
176 PCR and sequencing were done at the Dalhousie University CGEB-IMR (<http://cgeb-imr.ca>).  
177 Sequence data were deposited at the European Nucleotide Archive (ENA) public database under  
178 accession number PRJEB45042.

### 179 *Macro and Micro community analyses*

180 Amplicon reads were analyzed using the DADA2 pipeline (Callahan et al. 2016, Lee 2019),  
181 generating Amplicon Sequence Variants (ASVs) that were used as Operational Taxonomic Units  
182 (OTUs). Rarefaction curves (Simberloff 1978) for bacterial diversity were generated with the R  
183 package phyloseq v1.30.0 (McMurdie and Holmes 2013) and allowed us to define a sampling  
184 effort of 16,888 reads for microbial diversity comparisons across tidal levels (**Appendix S1:**



185 **Table S2).** The number of different OTUs and macroscopic species per unit area (hereafter  
186 called ‘richness’), were separately compared among treatments (three tidal zones, fixed factor)  
187 with Welch ANOVA, and one-way ANOVA for macro and micro communities, respectively,  
188 since the former displayed heteroscedasticity. The Games-Howell and a Tukey’s posteriori tests  
189 were performed after significant ANOVA results, for macro and microbial communities,  
190 respectively. Species and OTUs Shannon diversity indices were compared among tidal zones  
191 with separate Welch ANOVAs and Games-Howell a posteriori tests for macro and  
192 microorganisms, as they both exhibited heteroscedasticity. To quantify tidal variation in  
193 abundance and thus the intensity of zonation patterns, we calculated coefficients of variation  
194 (CV) across tidal levels of the most abundant macro and microorganisms at the level of species  
195 and Orders. To characterize community compositional differences and general structure among  
196 tidal zones, we conducted multivariate ordinations on presence/absence data using Jaccard  
197 distance index, and on relativized species/OTU abundances using Bray Curtis distance for Non-  
198 Metric Multidimensional Scaling ordinations. To test for statistical significance in community  
199 composition and structure among the intertidal zones, we conducted permutational analysis of  
200 variance (PERMANOVA) (Anderson and Walsh 2013), followed by pairwise a posteriori tests  
201 using FDR correction (Benjamini and Hochberg (1995), separately for micro and macroscopic  
202 organisms. We also conducted quantitative Principal Coordinate Analyses (PCoA) to represent  
203 tidal zones in the multispecies space to recover the centroid that defined the compositional  
204 groups for macro and microorganisms. This allowed us to calculate multivariate Mahalanobis  
205 distances among community centroids at the three intertidal zones. All multivariate analyses  
206 were conducted with the R package vegan v2.5-6 (Oksanen et al. 2015).

207 *Co-occurrence Network analyses*

208 To further compare the structure of macro- and microbial communities across tidal zones, we  
209 constructed co-occurrence networks for both groups using maximal information coefficient  
210 analysis applied to presence/absence data in the software MICtools (Albanese et al. 2018) to  
211 derive the strength and sign of correlation. Tidal zone specialists were identified with the  
212 Indicator Value (IndVal) (Dufrene and Legendre 1997) in the labdsv R package (Roberts and  
213 Roberts 2016), which identifies Species/OTUs associated to a given tidal zone based on fidelity  
214 and relative abundance. To compare network structures, we computed connectivity, the  
215 proportion of all possible edges that are realized in the network (Newman 2018), and transitivity,  
216 the ratio of the number of triangles to the paths of length two, which quantifies the clustering of  
217 the network (Wasserman and Faust 1994). Both metrics were calculated for micro and  
218 macroorganisms separately. We then identified the habitats specialists and not specialist in each  
219 network, according to the IndVal index, and represented positive and negative links within and  
220 between tidal zone compartments. To summarize patterns of positive and negative links, we  
221 calculated connectivity within and between entire compartments of habitat specialists and not  
222 specialist. The statistical significance of network connectivity and transitivity was evaluated  
223 against Erdos-Renyi random networks of the same size (Connor et al. 2017). The existence of  
224 compartments in the macro- and microbial networks was examined using the leading eigenvalue  
225 method (Newman 2006). Network metrics were computed using the R package iGraph (Csardi  
226 and Nepusz 2006).

227

## 228 **Results**

### 229 *Zonation of dominant taxa*

230 A total of 88 macroalgae (n= 40) and invertebrate (n = 48) species were found at the surveyed

231 sites of central Chile (**Appendix S1: Table S3**). Dominant species in each zone were similar to  
232 those reported in previous studies (Castilla 1981, Broitman et al. 2001) (**Appendix S1: Table**  
233 **S3**). We obtained 472,864 good-quality sequences from 28 samples for microbial community  
234 analyses. After rarefying to 16,888 reads per sample, due to the size of the smallest dataset of  
235 one low intertidal zone sample, we obtained a total of 6,252 OTUs (**Appendix S1: Table S2**).  
236 The main phyla in the intertidal zone were Proteobacteria (Alphaproteobacteria and  
237 Gammaproteobacteria), Bacteroidetes, Cyanobacteria, and Planctomycetes (**Appendix S1:**  
238 **Figure S2, Table S3**). Patterns of zonation, i.e., sharp changes in relative abundance, of the 14  
239 most abundant macroalgae and invertebrate species across the tidal gradient were very apparent  
240 (**Fig. 1**). Although most species were present at all three tidal zones, they show high abundance  
241 at a single (e.g., *Ectocarpus silicosus*, *Nodolittorina peruviana*) or, at the most, two tidal zones  
242 (e.g., *Ralfsia californica*, *Siphonaria lessoni*) (**Fig. 1a**). Zonation was also apparent in the 14  
243 most common OTUs, although the changes of abundance across tidal zones were attenuated  
244 compared to macroscopic organisms (**Fig. 1b**). This difference was reflected in larger  
245 coefficients of variation (CV) in macro- (mean= 123%) than micro-organisms (mean= 84%)  
246 (**Fig. 1c,d**). Pooling species and OTUs into the main Orders (**Appendix S1: Figure S1a,b**) still  
247 revealed patterns of specialization or zonation in macroorganisms, but only weakly so in  
248 microorganisms (mean CV: Macro= 125%, Micro= 62%) (**Appendix S1: Figure S1c,d**). A  
249 negative slope characterized the relationship between spatial variation in orders of macro- and  
250 micro-organisms and the number of species (S) within the Orders (**Fig. 2a,b**), but the  
251 relationship was statistically significant only for macroorganisms. The negative, buffering effect  
252 of diversity on variability across the gradient was similar in micro-and macro-organisms (similar  
253 slopes, ANCOVA interaction:  $p= 0.459$ ), and a single linear fit across micro and macro-

254 organisms was highly significant ( $CV = 150 - 66.8 + \log S$ ,  $R^2 = 0.43$ ,  $p = 0.001$ , **Appendix S2:**  
255 **Figure S1**), but this result should be taken with caution because of the inevitable collinearity  
256 produced by differences in richness (**Fig. 2c,d**). A detailed account of main macro-organisms  
257 and microbial orders and their variability across tidal zones is displayed in **Appendix S1: Figure**  
258 **S1**.

### 259 *Diversity across tidal zones*

260 Species richness of macroscopic communities was significantly different across tidal zones (**Fig.**  
261 **2c**, Welch's ANOVA,  $p < 0.0001$ ), with highest richness in the mid zone and lowest in the high  
262 zone. The richness of OTUs (using rarefaction of equal sampling effort) also showed  
263 significantly different values among intertidal zones (**Fig. 2d**, ANOVA,  $p = 0.0209$ ), with highest  
264 values in the low zone and lowest in the high zone. Microbial richness in the mid-zone reached  
265 intermediate levels and could not be statistically differentiated from values observed in the low  
266 or high zones. The Shannon diversity index for macroorganisms also showed significant  
267 differences among intertidal zones (**Fig. 2e**, Welch's ANOVA,  $p < 0.0001$ ), with higher and  
268 similar values in the middle and low zones than the high zone (Games-Howell post hoc test,  
269  $p = 0.49$ ). Microbial diversity also varied significantly among intertidal zones (**Fig. 2f**, Welch's  
270 ANOVA,  $p = 0.0143$ ) with the highest values in the low zone and lowest in the high zone  
271 (Games-Howell tests). Intermediate diversity levels in the mid zone could not be statistically  
272 separated from other tidal zones by a posteriori tests. Richness and Shannon diversity were  
273 significantly different between microbial communities of the three intertidal zones and the rock  
274 surface control (**Appendix S2: Figure S2**).

### 275 *Community and network structure*

276 The composition and relative abundances of the macroorganisms community were different

277 among the three tidal zones (**Fig. 3a,c**), with sharper separation between the low zone and the  
278 other two, and largest dispersion in the mid zone (**Fig. 3a, c**). These multispecific differences  
279 among zones were statistically significant (**Appendix S3: Table S1a,b**, PERMANOVA,  
280  $p=0.0009$  for Jaccard and Bray-Curtis distances), and paired comparisons showed that all  
281 intertidal zones differed from each other (FDR adjusted post-hoc tests:  $p=0.03$  Jaccard distances  
282 and  $p=0.02$  Bray-Curtis distances). The microbial communities tended to show similar patterns  
283 to their macroscopic counterparts, with a sharply defined low intertidal zone and increased  
284 overlap between the high and mid zones (**Fig. 3b,d**). In this case, the largest dispersion was  
285 observed in the high intertidal zone. Statistically significant differences were observed in  
286 microbial community composition and relative abundances (**Appendix S3: Table S1c,d**,  
287 PERMANOVA,  $p=0.0009$  for Jaccard and Bray-Curtis distances), and paired comparisons also  
288 showed that all zones differed from each other (FDR adjusted post-hoc test,  $p=0.03$  Jaccard and  
289  $p=0.02$  Bray-Curtis distances). Including the rock surface's control in the analyses did not alter  
290 this general pattern (**Appendix S3: Figure S1**).

291 The connectivity and transitivity analyses of the co-occurrence networks showed similar  
292 connectivity, 0.216 and 0.222 for macro and micro-organisms, respectively, and the same  
293 undirected transivities of 0.56. These transitivity values were in both cases significantly larger  
294 than the transitivity of random networks ( $p < 0.001$ ). While most species and OTUs changed in  
295 abundance across tidal zones, our IndVal index analyses allowed us to classify them into habitat  
296 specialists or not specialist and identify these types of species/OTUs in the networks (**Appendix**  
297 **S4: Table S1a,b**). The fraction of habitat specialists in the high, mid, and low zones was  
298 remarkably similar between micro- and macroorganisms (**Fig. 4a,b**), with the highest number  
299 found in the low shore. In micro and macroorganisms networks, positive correlations dominated

300 the links detected between taxa within all tidal zone compartments, while predominantly  
301 negative links were detected between species in the high and low shore compartments (**Fig. 4a,**  
302 **b**). In both networks, not specialist were positively and negatively connected with habitat  
303 specialists and other not specialist. These visual patterns were well captured in the connectivity  
304 summary within and between compartments. This showed high and generally positive  
305 connectivity within compartments, but strong and, on average, negative connection between the  
306 high and low zones (**Fig. 4c,d**). Macroorganisms restricted to the high intertidal and  
307 microorganisms restricted to the low intertidal are particularly highly connected within their  
308 groups of habitat specialists with connectivity of 0.73 and 0.58, respectively, and strong positive  
309 correlation (**Fig. 4c,d**). In both networks, the average correlation strengths between specialists  
310 and nonspecialists was very weak, although the values were higher in macro-organisms than in  
311 the microbial network (**Fig. 4c,d**), a pattern that was apparent in the visual representation of  
312 links. Despite these remarkable similarities, the two networks had different degree distributions,  
313 i.e., how the number of links of each node are distributed, with binomial distribution in  
314 macroscopic organisms and power-law degree distribution in microorganisms (**Appendix S4:**  
315 **Figure S1**). Modularity analyses of the entire networks showed a weak and non-significant  
316 relationship of compartments to the tidal zonation in both networks (**Appendix S4: Figure S2**).

317

## 318 **Discussion**

319 Our combination of intertidal surveys and experiments allowed us to characterize microbial  
320 communities and make sensible comparisons with macroscopic organisms across one of the best  
321 studied environmental gradients in the world. While it is true that these comparisons are  
322 constrained by methodological issues, which bound our conclusions, they still shed light on the

323 processes driving ecological organization in microbial organisms and how different they may be  
324 from those affecting co-occurring macroscopic components of these communities. Our results  
325 partially support the idea that microbes are less affected by environmental variability than  
326 macroscopic counterparts. First, while a similar fraction of all micro-and macro-organisms can  
327 be considered as ‘habitat specialists’, i.e., largely restricted to a given tidal zone, the 14 most  
328 common microbial species exhibit much less variation across tides than the most common  
329 macroscopic organisms, suggesting the former perceive a more homogeneous environment  
330 and/or are more resistant to the associated stress. At the community-level, however, most  
331 indicators of community structure and attributes of co-occurrence networks across the gradient  
332 were remarkably similar between microbes and macro-organisms, suggesting that despite orders  
333 of magnitude differences in richness and size, these two systems respond to stress gradients at a  
334 multispecific level in similar ways. We discuss these results below but start with a brief  
335 discussion of the methods used, which must be borne in mind when drawing conclusions.  
336 Methodological approximation to intertidal biofilm studies has followed two general approaches.  
337 Firsts, removal of sections of natural, existing rocks from the environment with different  
338 exposure time (De la Iglesia et al. 2012, Taylor et al. 2014, Tan et al. 2015, Kerfahi et al. 2020),  
339 or the installation of artificial surfaces such as plexiglass, polystyrene, or glass slides (Zhang et  
340 al. 2013, Sanli et al. 2015). The first approach is useful for examining the composition of  
341 microbial communities but makes it difficult to make sensible comparisons across gradients  
342 because the successional time is unknown. The second approach allows for comparative studies,  
343 but the specificity of microbial communities for different surfaces limits interpretation to natural  
344 systems. Our study attempts to solve these issues using the same natural rock surface, with the  
345 same area, physical attributes, chemical composition, and the same exposure time for all

346 treatments, allowing us to compare among treatments and extrapolate to natural rock surfaces.  
347 Still, some variation in micro-flows concerning a flat rocky platform is inevitable. Moreover, we  
348 opted to excluded macro-organisms and, in this manner, reduce interactions with macroscopic  
349 organisms, especially molluscan grazers. This was a difficult decision because it introduced the  
350 potential artifact of having a stainless-steel mesh reducing the light incidence and probably  
351 ameliorating stress on experimental rocks. We could devise no appropriate control for this  
352 artifact without a prohibitively large number of treatments. Future studies should therefore  
353 consider these potential cage effects and experimentally assess the effect of macroscopic  
354 organisms on reported patterns of microbial zonation. Finally, we decided to use large numbers  
355 of surveys for macroscopic organisms at the biofilm study site and nearby sites (see **Appendix**  
356 **S1: Table S1**), to have a larger sample for co-occurrence network analyses. This can be easily  
357 changed by considering only one or more sites and data are made available. Our broad  
358 conclusion is not altered by this consideration.

359 Our results indicated that dominant microbial organisms across the same environmental gradient  
360 showed comparatively less differentiation across tidal levels than their macroscopic counterpart.  
361 i.e., the tidal gradient strongly shaped the most abundant species and OTUs. The common  
362 explanation for this might be that the environmental conditions in the intertidal rocky shore  
363 perceived at the microscopic level are less stringent than those perceived by macroscopic  
364 organisms. While this is entirely possible, it is also possible that these organisms are more  
365 resistant to similar gradients in stress, which can only be assessed by experimentally  
366 manipulating stress levels. To what extent the cage used to exclude macroscopic organisms  
367 reduced the amplitude of the stress gradient must also be further investigated. Regardless of the  
368 mechanism accounting for differences in stress-related responses at the ‘species’ level, we



369 observed a strong buffering effect of species richness within higher taxa, such as Orders, on the  
370 response to the stress gradient when considering micro and macro-organisms together.  
371 (**Appendix S1: Figure S1**), and that the effect was apparently homogeneous between these  
372 groups (non-significantly different slopes). Thus, there is an indication that in both groups,  
373 increased species redundancy confers resistance to environmental stress as a taxon. This is an  
374 interesting result that deserves further studies as it suggests similarities between micro and  
375 macroscopic worlds. However, it must still be taken with caution because the linear fit  
376 relationship was marginally non-significant for the microscopic organism when analyzed  
377 separately. These results also call for caution when analyzing microbial communities across  
378 space without resolving to OTUs level because aggregation at higher taxa is bound to support the  
379 everything is everywhere paradigm equivocally.

380 At the community-level, stress gradient responses of micro and macroscopic communities  
381 become more similar. The time exposure to radiation, high temperature, ultraviolet light, and  
382 desiccation are factors that could explain the similar trends across the gradient between these two  
383 communities because, in both group lowest values of abundance, richness and diversity were  
384 observed in the high intertidal zone, increasing to the middle and low tidal levels. Other studies  
385 supported this finding and described a higher abundance of epilithic biofilms in the lower  
386 intertidal zone than the upper zone due to desiccation and UV light (Aleem 1950, Castenholz  
387 1963, Underwood 1984, Thompson et al. 2004). Accordingly, the gradients of abiotic factors in  
388 the intertidal may promote adaptation to these stringent conditions and, as a consequence,  
389 increase the habitat specialists (Logares et al. 2013). Thus, restricted distribution of taxa in the  
390 intertidal zone may be more common than generally accepted and differences between micro-  
391 and microorganisms may not be substantial. This also suggests an imprint of marine over

392 ‘terrestrial’ origin of intertidal microorganisms, as it occurs in rocky shore macro-organisms.  
393 Co-occurrence networks of macro and microorganisms showed similar levels of connectivity and  
394 transitivity between the clusters despite the large differences in absolute richness, indicative of  
395 non-random clustering within the networks (Röttjers and Faust 2018); consequently, these  
396 networks had modules (cluster of Species/OTUs highly connected) corresponding roughly with  
397 tidal levels. Those clusters of species were generally more connected than the networks as a  
398 whole. Freilich et al. (2018) observe that co-occurrence networks might represent niche  
399 preferences of component species more than they reflect specific biotic interactions. Therefore,  
400 networks constructed from known interactions (i.e., consumption) are not directly comparable to  
401 co-occurrence networks. Also, Co-occurrence networks of microorganisms are structured by  
402 environmental heterogeneity (e.g., pH, aridity, net primary productivity in soil (Delgado-  
403 Baquerizo et al. 2018), and depth in a marine system (Cram et al. 2015)). With this caveat in  
404 mind, the fact remains that networks of micro-and macro-organisms show several remarkably  
405 similar attributes and some important differences across the tidal gradient.  
406 Highly positive associations were observed for species restricted to the high intertidal zone  
407 (Freilich et al. 2018), whereas highly positive correlations were observed for OTUs limited to the  
408 low intertidal zone. The low intertidal zone is generally expected to be the benign end of the  
409 environmental stress gradient for organisms of marine origin, which include both micro and  
410 macroorganisms. Still, the resulting co-occurrence patterns of positive associations differ  
411 between both networks. This supports that communities of macro-and microorganism respond in  
412 different ways to the same environmental forcing due possibly to differences in their resiliency  
413 to Ambiental stress, different mediating effects of biotic interactions, and dormancy in microbial  
414 communities (Mestre and Höfer 2021). But, despite orders of magnitude differences in richness

415 and size, the macro and micro-communities respond to stress gradients, giving rise to specific  
416 zonation patterns in the intertidal rocky shore.

417

#### 418 **Acknowledgements**

419 We thank Sergio Celis at ATIKA Ltda, André Comeau at CGEB-IMR. We are also indebted to  
420 many students and research assistants at ECIM who collaborated with us in the field and  
421 laboratory. Funding for these studies and for international collaboration was provided by  
422 CONICYT (ANID) – National PhD scholarship Program 2016 to CMAB, and by Fondecyt  
423 grants No. 1160289 and 1200636 to SAN, and No. 1171259 to RDI. Complementary funding  
424 was provided by ANID PIA/BASAL FB0002 to SAN.

425

#### 426 **References**

427 Albanese, D., S. Riccadonna, C. Donati, and P. Franceschi. 2018. A practical tool for maximal  
428 information coefficient analysis. *GigaScience* 7.

429 Aleem, A. A. 1950. Distribution and ecology of British marine littoral diatoms. *Journal of*  
430 *ecology* 38:75–106.

431 Anderson, M. J., and D. C. I. Walsh. 2013. PERMANOVA, ANOSIM, and the Mantel test in the  
432 face of heterogeneous dispersions: What null hypothesis are you testing? *Ecological*  
433 *Monographs* 83:557–574.

434 Barnes, R. S. K., and R. N. Hughes. 1999. *An introduction to marine ecology*. John Wiley &  
435 Sons.

- 436 Benjamini, Y., and Y. Hochberg. 1995. Controlling the False Discovery Rate: A Practical and  
437 Powerful Approach to Multiple Testing. *Journal of the Royal Statistical Society: Series B*  
438 (Methodological) 57:289–300.
- 439 Bertness, M. D., and G. H. Leonard. 1997. The role of positive interactions in communities:  
440 Lessons from intertidal habitats. *Ecology* 78:1976–1989.
- 441 Broitman, B., S. Navarrete, F. Smith, and S. Gaines. 2001. Geographic variation of southeastern  
442 Pacific intertidal communities. *Marine Ecology Progress Series* 224:21–34.
- 443 Callahan, B. J., P. J. McMurdie, M. J. Rosen, A. W. Han, A. J. A. Johnson, and S. P. Holmes.  
444 2016. DADA2: High-resolution sample inference from Illumina amplicon data. *Nature*  
445 *Methods* 13:581–583.
- 446 Callow, J. A., and M. E. Callow. 2011. Trends in the development of environmentally friendly  
447 fouling-resistant marine coatings. *Nature Communications* 2:244.
- 448 Castenholz, R. W. 1963. An experimental study of vertical distribution of littoral marine  
449 Diatoms. *Limnology and Oceanography* 8:450–462.
- 450 Castilla, J. C. 1981. Perspectivas de investigación en estructura y dinámica de comunidades  
451 intermareales rocosas de Chile central, 2: Depredadores de alto nivel trópico. *Medio*  
452 *Ambiente (Chile)* 5:190–215.
- 453 Connell, J. H. 1961a. Effects of Competition, Predation by *Thais lapillus*, and Other Factors on  
454 Natural Populations of the Barnacle *Balanus balanoides*. *Ecological Monographs* 31:61–  
455 104.
- 456 Connell, J. H. 1961b. The Influence of Interspecific Competition and Other Factors on the  
457 Distribution of the Barnacle *Chthamalus Stellatus*. *Ecology* 42:710–723.

- 458 Connor, N., A. Barberán, and A. Clauset. 2017. Using null models to infer microbial co-  
459 occurrence networks. *PLOS ONE* 12:e0176751.
- 460 Cram, J. A., L. C. Xia, D. M. Needham, R. Sachdeva, F. Sun, and J. A. Fuhrman. 2015. Cross-  
461 depth analysis of marine bacterial networks suggests downward propagation of temporal  
462 changes. *The ISME Journal* 9:2573–2586.
- 463 Csardi, G., and T. Nepusz. 2006. The igraph software package for complex network research.  
464 *InterJournal, Complex Systems*, 1695.:9.
- 465 Dang, H., and C. R. Lovell. 2016. Microbial Surface Colonization and Biofilm Development in  
466 Marine Environments. *Microbiology and Molecular Biology Reviews* 80:91–138.
- 467 Davey, M. E., and G. A. O’toole. 2000. Microbial Biofilms: from Ecology to Molecular  
468 Genetics. *Microbiology and Molecular Biology Reviews* 64:847–867.
- 469 De la Iglesia, R., D. Valenzuela-Heredia, S. Andrade, J. Correa, and B. González. 2012.  
470 Composition dynamics of epilithic intertidal bacterial communities exposed to high  
471 copper levels. *FEMS Microbiology Ecology* 79:720–727.
- 472 Decho, A. W. 2000. Microbial biofilms in intertidal systems: an overview. *Continental Shelf*  
473 *Research*:17.
- 474 Delgado-Baquerizo, M., A. M. Oliverio, T. E. Brewer, A. Benavent-González, D. J. Eldridge, R.  
475 D. Bardgett, F. T. Maestre, B. K. Singh, and N. Fierer. 2018. A global atlas of the  
476 dominant bacteria found in soil. *Science* 359:320–325.
- 477 Denny, M. W., and R. T. Paine. 1998. Celestial Mechanics, Sea-Level Changes, and Intertidal  
478 Ecology. *The Biological Bulletin* 194:108–115.

- 479 Devaney, J. M., and M. A. Marino. 2001. Purification methods for preparing polymerase chain  
480 reaction products for capillary electrophoresis analysis. Pages 43–49 *Capillary*  
481 *Electrophoresis of Nucleic Acids*. Springer.
- 482 Dufrene, M., and P. Legendre. 1997. Species Assemblages and Indicator Species: The Need for a  
483 Flexible Asymmetrical Approach. *Ecological Monographs* 67:345.
- 484 Evans, R. G. 1947. The Intertidal Ecology of Selected Localities in the Plymouth  
485 Neighbourhood. *Journal of the Marine Biological Association of the United Kingdom*  
486 27:173–218.
- 487 Follows, M. J., S. Dutkiewicz, S. Grant, and S. W. Chisholm. 2007. Emergent Biogeography of  
488 Microbial Communities in a Model Ocean. *Science* 315:1843–1846.
- 489 Fontaneto, D. 2011. *Biogeography of microscopic organisms: is everything small everywhere?*  
490 Cambridge University Press. 79:388.
- 491 Freilich, M. A., E. Wieters, B. R. Broitman, P. A. Marquet, and S. A. Navarrete. 2018. Species  
492 co-occurrence networks: Can they reveal trophic and non-trophic interactions in  
493 ecological communities? *Ecology* 99:690–699.
- 494 Fuhrman, J. A., D. E. Comeau, A. Hagstrom, and A. M. Chan. 1988. Extraction from Natural  
495 Planktonic Microorganisms of DNA Suitable for Molecular Biological Studies. *Applied*  
496 *and Environmental Microbiology* 54:1426–1429.
- 497 Hanson, C. A., J. A. Fuhrman, M. C. Horner-Devine, and J. B. H. Martiny. 2012. Beyond  
498 biogeographic patterns: processes shaping the microbial landscape. *Nature Reviews*  
499 *Microbiology* 10:497–506.

- 500 Harley, C. D. G., and B. S. T. Helmuth. 2003. Local- and regional-scale effects of wave  
501 exposure, thermal stress, and absolute versus effective shore level on patterns of intertidal  
502 zonation. *Limnology and Oceanography* 48:1498–1508.
- 503 Hug, L. A., B. J. Baker, K. Anantharaman, C. T. Brown, A. J. Probst, C. J. Castelle, C. N.  
504 Butterfield, A. W. Hermsdorf, Y. Amano, K. Ise, Y. Suzuki, N. Dudek, D. A. Relman, K.  
505 M. Finstad, R. Amundson, B. C. Thomas, and J. F. Banfield. 2016. A new view of the  
506 tree of life. *Nature Microbiology* 1:16048.
- 507 Kéfi, S., E. L. Berlow, E. A. Wieters, L. N. Joppa, S. A. Wood, U. Brose, and S. A. Navarrete.  
508 2015. Network structure beyond food webs: mapping non-trophic and trophic interactions  
509 on Chilean rocky shores. *Ecology* 96:291–303.
- 510 Kerfahi, D., B. P. Harvey, S. Agostini, K. Kon, R. Huang, J. M. Adams, and J. M. Hall-Spencer.  
511 2020. Responses of Intertidal Bacterial Biofilm Communities to Increasing pCO<sub>2</sub>.  
512 *Marine Biotechnology* 22:727–738.
- 513 Krause, E., A. Wichels, L. Giménez, M. Lunau, M. B. Schilhabel, and G. Gerdt. 2012. Small  
514 Changes in pH Have Direct Effects on Marine Bacterial Community Composition: A  
515 Microcosm Approach. *PLoS ONE* 7:e47035.
- 516 Lee, M. 2019. Happy Belly Bioinformatics: an open-source resource dedicated to helping  
517 biologists utilize bioinformatics. *Journal of Open Source Education* 2:53.
- 518 Logares, R., I. M. Deutschmann, P. C. Junger, C. R. Giner, A. K. Krabberød, T. S. B. Schmidt,  
519 L. Rubinat-Ripoll, M. Mestre, G. Salazar, C. Ruiz-González, M. Sebastián, C. de Vargas,  
520 S. G. Acinas, C. M. Duarte, J. M. Gasol, and R. Massana. 2020. Disentangling the  
521 mechanisms shaping the surface ocean microbiota. *Microbiome* 8:55.

- 522 Logares, R., E. S. Lindström, S. Langenheder, J. B. Logue, H. Paterson, J. Laybourn-Parry, K.  
523 Rengefors, L. Tranvik, and S. Bertilsson. 2013. Biogeography of bacterial communities  
524 exposed to progressive long-term environmental change. *The ISME Journal* 7:937–948.
- 525 Lubchenco, J. 1978. Plant Species Diversity in a Marine Intertidal Community: Importance of  
526 Herbivore Food Preference and Algal Competitive Abilities. *The American Naturalist*  
527 112:23–39.
- 528 Mandakovic, D., C. Rojas, J. Maldonado, M. Latorre, D. Travisany, E. Delage, A. Bihouée, G.  
529 Jean, F. P. Díaz, B. Fernández-Gómez, P. Cabrera, A. Gaete, C. Latorre, R. A. Gutiérrez,  
530 A. Maass, V. Cambiazo, S. A. Navarrete, D. Eveillard, and M. González. 2018. Structure  
531 and co-occurrence patterns in microbial communities under acute environmental stress  
532 reveal ecological factors fostering resilience. *Scientific Reports* 8:5875.
- 533 McMurdie, P. J., and S. Holmes. 2013. phyloseq: An R Package for Reproducible Interactive  
534 Analysis and Graphics of Microbiome Census Data. *PLoS ONE* 8:e61217.
- 535 Menge, B. A., and J. P. Sutherland. 1987. Community Regulation: Variation in Disturbance,  
536 Competition, and Predation in Relation to Environmental Stress and Recruitment. *The*  
537 *American Naturalist* 130:730–757.
- 538 Mestre, M., and J. Höfer. 2021. The Microbial Conveyor Belt: Connecting the Globe through  
539 Dispersion and Dormancy. *Trends in Microbiology* 29:482–492.
- 540 Mittelbach, G. G., and B. J. McGill. 2019. *Community ecology*. Second edition. Oxford  
541 University Press, Oxford, United Kingdom ; New York, NY.
- 542 Newman, M. 2018. *Networks*. Oxford university press.
- 543 Newman, M. E. J. 2006. Finding community structure in networks using the eigenvectors of  
544 matrices. *Physical Review*.



- 545 Oksanen, J., F. Blanchet, R. Kindt, P. Legendre, P. Minchin, R. O’Hara, G. Simpson, P.  
546 Solymos, M. Stevens, and H. Wagner. 2015. Vegan: community ecology package. R  
547 package vegan, vers. 2.2-1. *Worl. Agro. Cent* 3:7–81.
- 548 O’Malley, M. A. 2007. The nineteenth century roots of “everything is everywhere.” *Nature*  
549 *Reviews Microbiology* 5:647–651.
- 550 Paine, R. T. 1966. Food Web Complexity and Species Diversity. *The American Naturalist*  
551 100:65–75.
- 552 Parada, A. E., D. M. Needham, and J. A. Fuhrman. 2016. Every base matters: assessing small  
553 subunit rRNA primers for marine microbiomes with mock communities, time series and  
554 global field samples: Primers for marine microbiome studies. *Environmental*  
555 *Microbiology* 18:1403–1414.
- 556 Raffaelli, D., and S. J. Hawkins. 2012. *Intertidal ecology*. Springer Science & Business Media.
- 557 Roberts, D. W., and M. D. W. Roberts. 2016. Package ‘labdsv.’ *Ordination and Multivariate* 775.
- 558 Röttgers, L., and K. Faust. 2018. From hairballs to hypotheses—biological insights from microbial  
559 networks. *FEMS Microbiology Reviews* 42:761–780.
- 560 Rousk, J., E. Bååth, P. C. Brookes, C. L. Lauber, C. Lozupone, J. G. Caporaso, R. Knight, and N.  
561 Fierer. 2010. Soil bacterial and fungal communities across a pH gradient in an arable soil.  
562 *The ISME Journal* 4:1340–1351.
- 563 Sanli, K., J. Bengtsson-Palme, R. H. Nilsson, E. Kristiansson, M. Alm Rosenblad, H. Blanck,  
564 and K. M. Eriksson. 2015. Metagenomic sequencing of marine periphyton: taxonomic  
565 and functional insights into biofilm communities. *Frontiers in Microbiology* 6.
- 566 Santelices, B. 1990. Patterns of organizations of intertidal and shallow subtidal vegetation in  
567 wave exposed habitats of central Chile. *Hydrobiologia* 192:35–57.

- 568 Schuster, H., M. S. Davies, S. J. Hawkins, P. S. Moschella, R. J. Murphy, R. C. Thompson, and  
569 A. J. Underwood. 2019. Biofilms in Intertidal Habitats. Pages 448–473 in S. J. Hawkins,  
570 K. Bohn, L. B. Firth, and G. A. Williams, editors. *Interactions in the Marine Benthos*.  
571 First edition. Cambridge University Press.
- 572 Simberloff, D. 1978. Use of rarefaction and related methods in ecology. Page Biological data in  
573 water pollution assessment: quantitative and statistical analyses. ASTM International.
- 574 Stephenson, T. A., and A. Stephenson. 1949. The Universal Features of Zonation Between Tide-  
575 Marks on Rocky Coasts. *The Journal of Ecology* 37:289.
- 576 Tan, E. L.-Y., M. Mayer-Pinto, E. L. Johnston, and K. A. Dafforn. 2015. Differences in Intertidal  
577 Microbial Assemblages on Urban Structures and Natural Rocky Reef. *Frontiers in*  
578 *Microbiology* 6.
- 579 Taylor, J. D., R. Ellis, M. Milazzo, J. M. Hall-Spencer, and M. Cunliffe. 2014. Intertidal epilithic  
580 bacteria diversity changes along a naturally occurring carbon dioxide and pH gradient.  
581 *FEMS Microbiology Ecology* 89:670–678.
- 582 Thompson, R. C., T. P. Crowe, and S. J. Hawkins. 2002. Rocky intertidal communities: past  
583 environmental changes, present status and predictions for the next 25 years.  
584 *Environmental Conservation* 29:168–191.
- 585 Thompson, R. C., T. A. Norton, and S. J. Hawkins. 2004. Physical stress and biological control  
586 regulate the producer-consumer balance in intertidal biofilms. *Ecology* 85:1372–1382.
- 587 Thompson, R., P. Moschella, S. Jenkins, T. Norton, and S. Hawkins. 2005. Differences in  
588 photosynthetic marine biofilms between sheltered and moderately exposed rocky shores.  
589 *Marine Ecology Progress Series* 296:53–63.

- 590 Underwood, A. 1972. Tide-model analysis of the zonation of intertidal prosobranchs. I. Four  
591 species of *Littorina* (L.). *Journal of Experimental Marine Biology and Ecology* 9:239–  
592 255.
- 593 Underwood, A. J. 1984. The vertical distribution and seasonal abundance of intertidal microalgae  
594 on a rocky shore in New South Wales. *Journal of Experimental Marine Biology and*  
595 *Ecology* 78:199–220.
- 596 Wasserman, S., and K. Faust. 1994. *Social network analysis: Methods and applications*.  
597 Cambridge university press.
- 598 Wethey, D. S. 1983. Geographic limits and local zonation: The barnacles *Semibalanus* (*Balanus*)  
599 and *Chthamalus* in New England. *The Biological Bulletin* 165:330–341.
- 600 Whittaker, R. H. 1959. On the Broad Classification of Organisms. *The Quarterly Review of*  
601 *Biology* 34:210–226.
- 602 de Wit, R., and T. Bouvier. 2006. “Everything is everywhere, but, the environment selects”; what  
603 did Baas Becking and Beijerinck really say? *Environmental Microbiology* 8:755–758.
- 604 Zhang, W., Y. Wang, O. O. Lee, R. Tian, H. Cao, Z. Gao, Y. Li, L. Yu, Y. Xu, and P.-Y. Qian.  
605 2013. Adaptation of intertidal biofilm communities is driven by metal ion and oxidative  
606 stresses. *Scientific Reports* 3:3180.
- 607
- 608
- 609
- 610
- 611
- 612

613 **Figure legend**

614 **Fig. 1.** Zonation patterns of the 14 most abundant species (in terms of relativized cover, density,  
615 or reads of sessile invertebrates and macroalgal species, mobile invertebrate species, or OTUs,  
616 respectively), expressed here as relative to the maximum abundance observed in a given zone for  
617 **A) Macroorganisms** and **B) Microorganisms**. The coefficients of variation (CV%) across tidal  
618 zones for the same species and OTUs are shown for **C) macro-** and **D) micro-**organisms. The  
619 horizontal lines are mean CV for macroorganisms = 123.2% and microorganisms = 84.6%.

620

621 **Fig. 2.** Linear regression between the coefficient of variation across tidal zones and the OTUs  
622 richness within Orders for macro- (**A**) and microorganisms (**B**). Mean (+ SE) richness (**C,D**) and  
623 Shannon diversity (**E,F**) of (**C,E**) macroscopic community and (**D,F**) microbial community in  
624 the high, middle, and low intertidal zones. Different letters above bars indicate significant  
625 differences with a posteriori tests (**C,E, F**: Games-Howell tests, **D**: Tukey test at the experiment  
626 wise error rate = 0.05).

627

628 **Fig. 3.** Compositional similarity of the different intertidal rocky shore zones for macroorganisms  
629 (N= 88 species) and microorganisms (N= 6,252 OTUs). Non-metric multidimensional scaling  
630 (NMDS) ordination plots based on presence/absence data using Jaccard distances (**A, C**), and on  
631 abundance data using Bray-Curtis distances (**B, D**). The symbols represent the different intertidal  
632 zones, surrounded by the ellipse of 95% confidence interval. Each observation is a survey unit  
633 (50 x 50 cm quadrats for macroscopic organisms, 3 x 8 cm rock surface coupons for microbes).

634

635 **Fig. 4.** Co-occurrence networks of **A) macroorganisms** and **B) microorganisms** communities.

636 The node color denotes the intertidal zone specialists at the (●/●) high, (●/●) middle and (●/●)  
637 low intertidal zone. The gray nodes (●) are species/OTUs without specialisms. The edge color  
638 denotes (----) positive correlation and (---) negative correlation. The magnitude of the correlation  
639 is shown by the intensity of the shade, as depicted in the legend between the two networks.  
640 Connectivity of subnetworks of C) macroorganisms and D) microorganisms communities. The  
641 edge width is proportional to the connectivity within and between each subnetworks of tidal  
642 height specialists. The edges are labeled with the connectivity. “None” indicates non-specialists.  
643 The edge color is proportional to the average correlation in subnetworks within and between  
644 tidal height specialists and non-specialists.  
645  
646  
647  
648

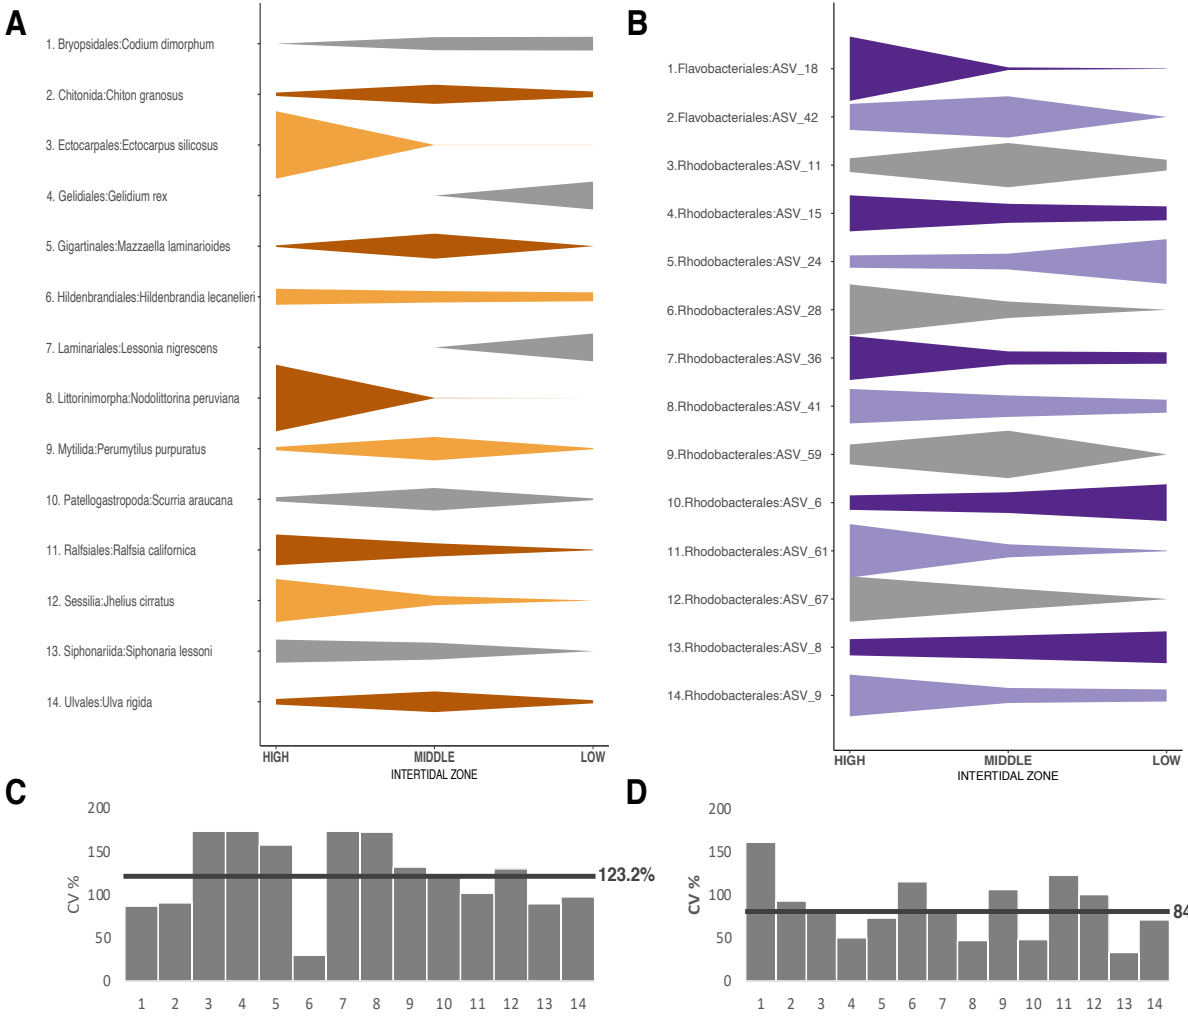

649

650 **Figure 1.**

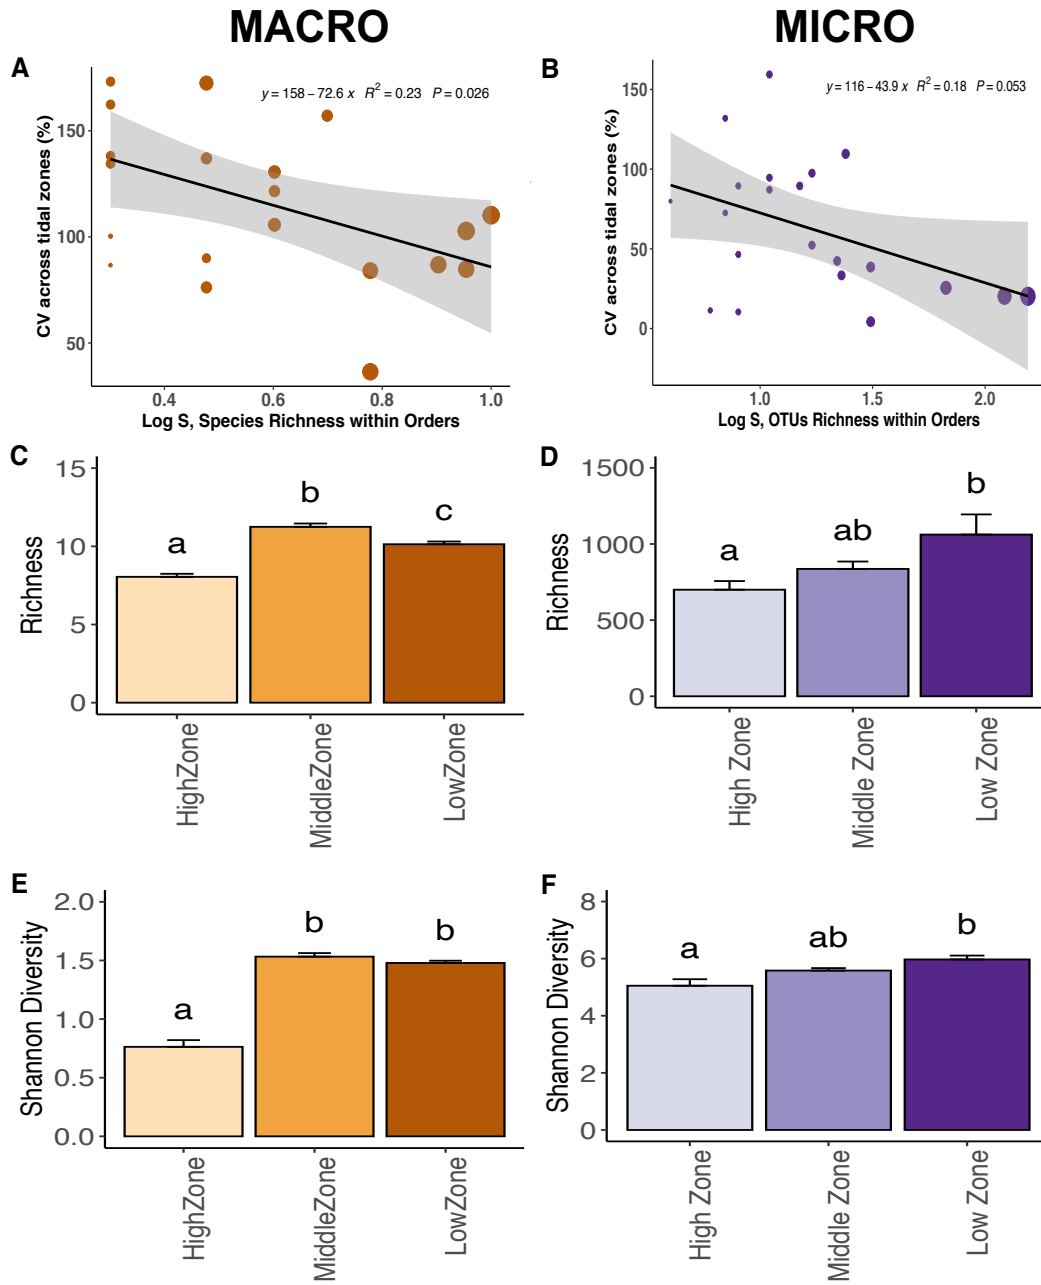

651

652 **Figure 2.**

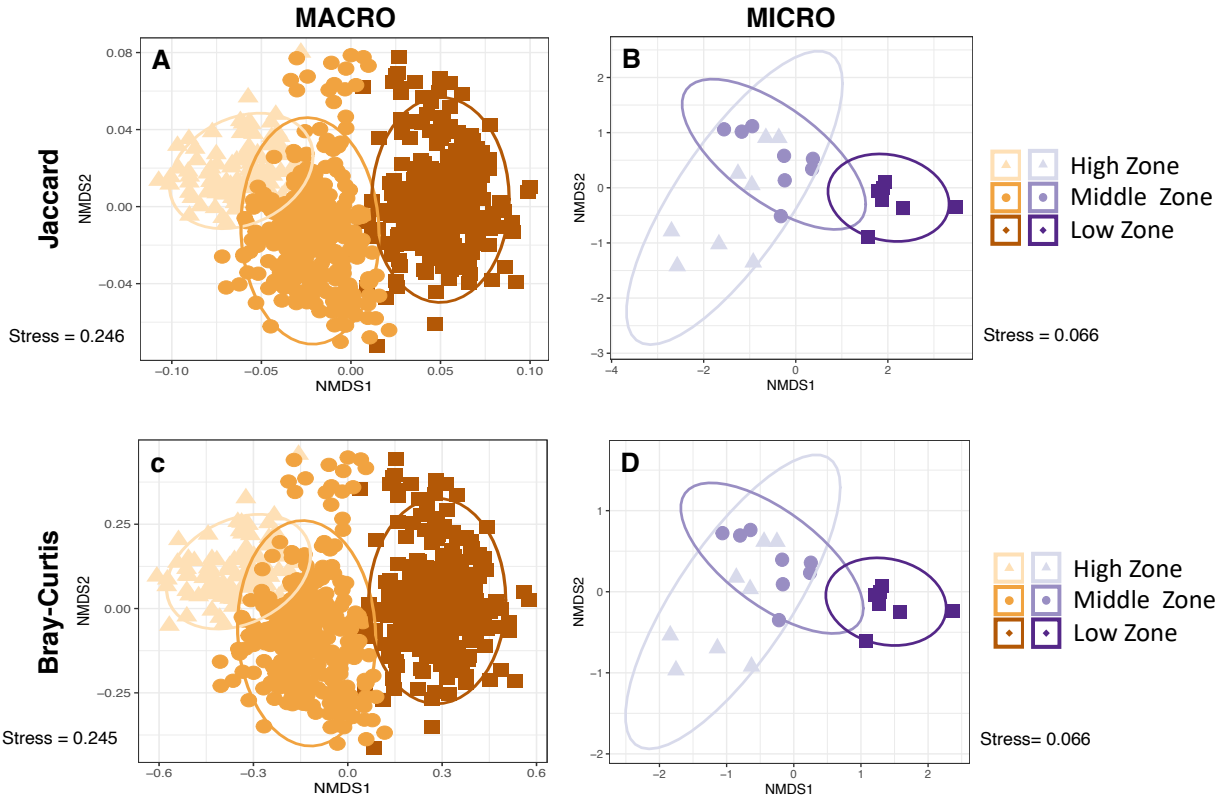

653

654 **Figure 3.**



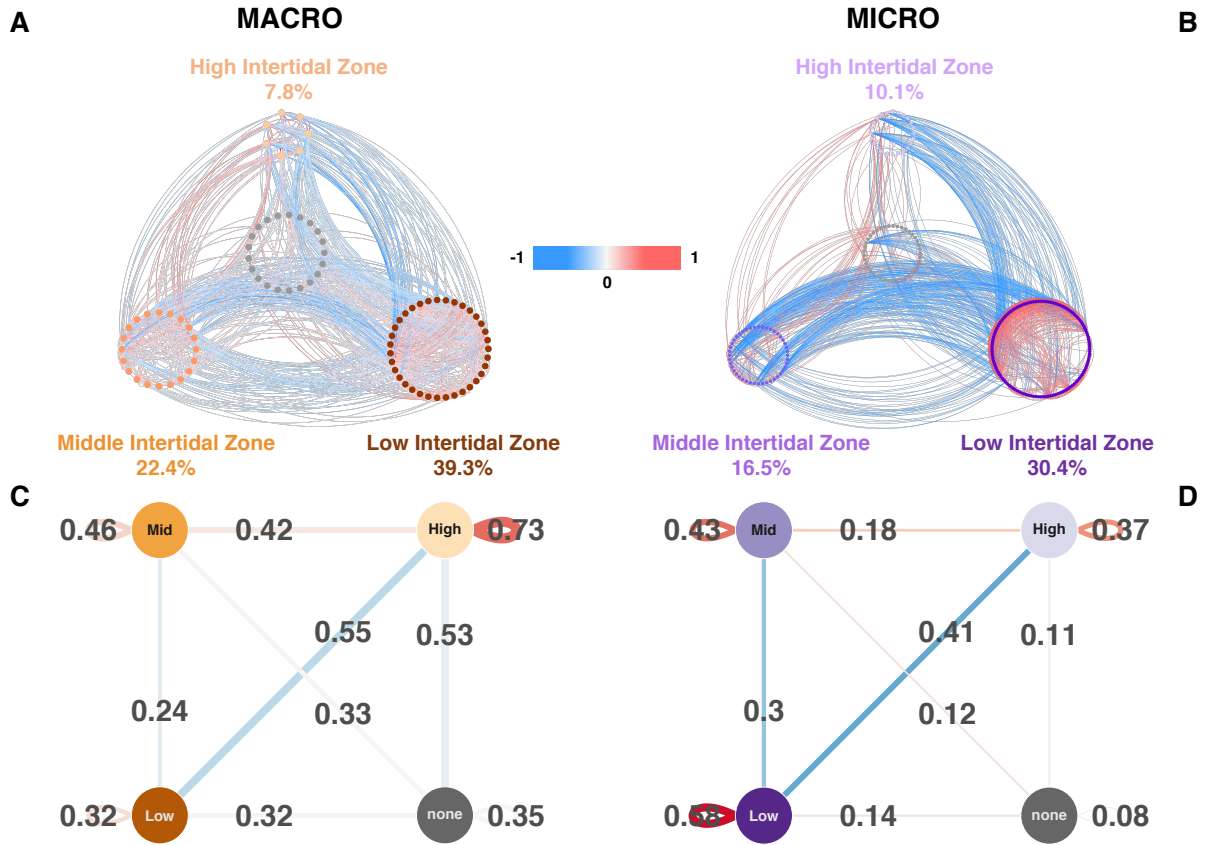

655

656 **Figure 4.**
